# Supplementary material for: PTENε suppresses tumor metastasis through regulation of filopodia formation
Source: PubMed Central journal article supplement — EMBO J. 2021 Mar 23;40(10):e105806. doi: 10.15252/embj.2020105806 (PMC8126949; doi:10.15252/embj.2020105806), 2021-03-23
Supplement: EMBJ-40-e105806-s007.pdf [file EMBJ-40-e105806-s007.pdf]

## Expanded View Figures

**Figure EV1. The MS/MS spectrum of the peptide of endogenous PTEN $\epsilon$  in HeLa cells that matches the N-terminal sequence of PTEN $\epsilon$ .**

- A The MS/MS spectrum of the peptide (MAAEEKQAQSLQPSSSR) of endogenous PTEN $\epsilon$  in HeLa cells that matches the most N-terminal sequence of PTEN $\epsilon$ . Protein lysates of HeLa cells were subjected to sequential immunoprecipitation with the anti-PTEN $\alpha$  antibody. The bound proteins were separated with SDS-PAGE, and gel slices of the band ranked fifth by molecular weight were analyzed by mass spectrometry.
- B, C Detection of the relative expression of PTEN isoforms vs. canonical PTEN in *Pten<sup>FLAG</sup>* knock-in mice. Various tissues from *Pten<sup>FLAG</sup>* knock-in mice or control wild-type mice were lysed for immunoprecipitation with the anti-FLAG M2 magnetic beads before immunoblotting with the anti-PTEN antibody (B). The protein level of canonical PTEN and PTEN $\epsilon$  was measured by evaluating the gray value of corresponding protein bands in each panel (C).

Source data are available online for this figure.

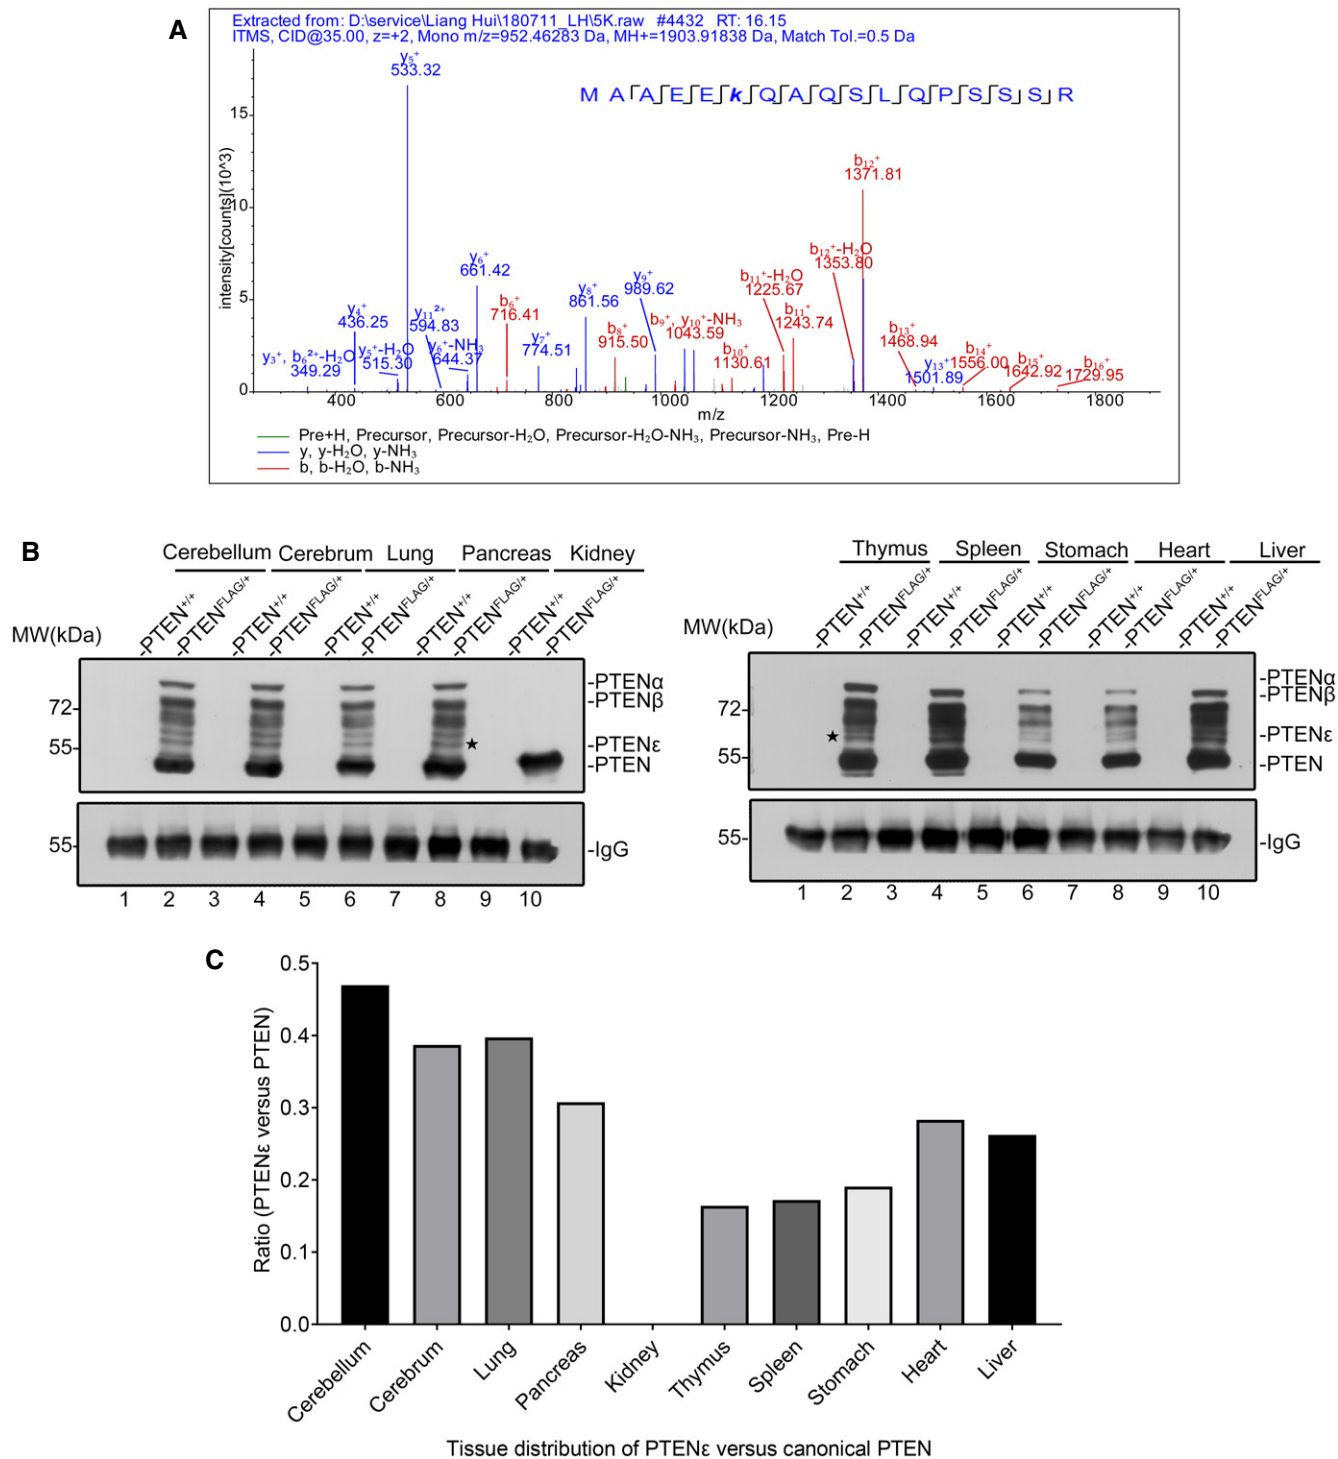

Figure EV1.

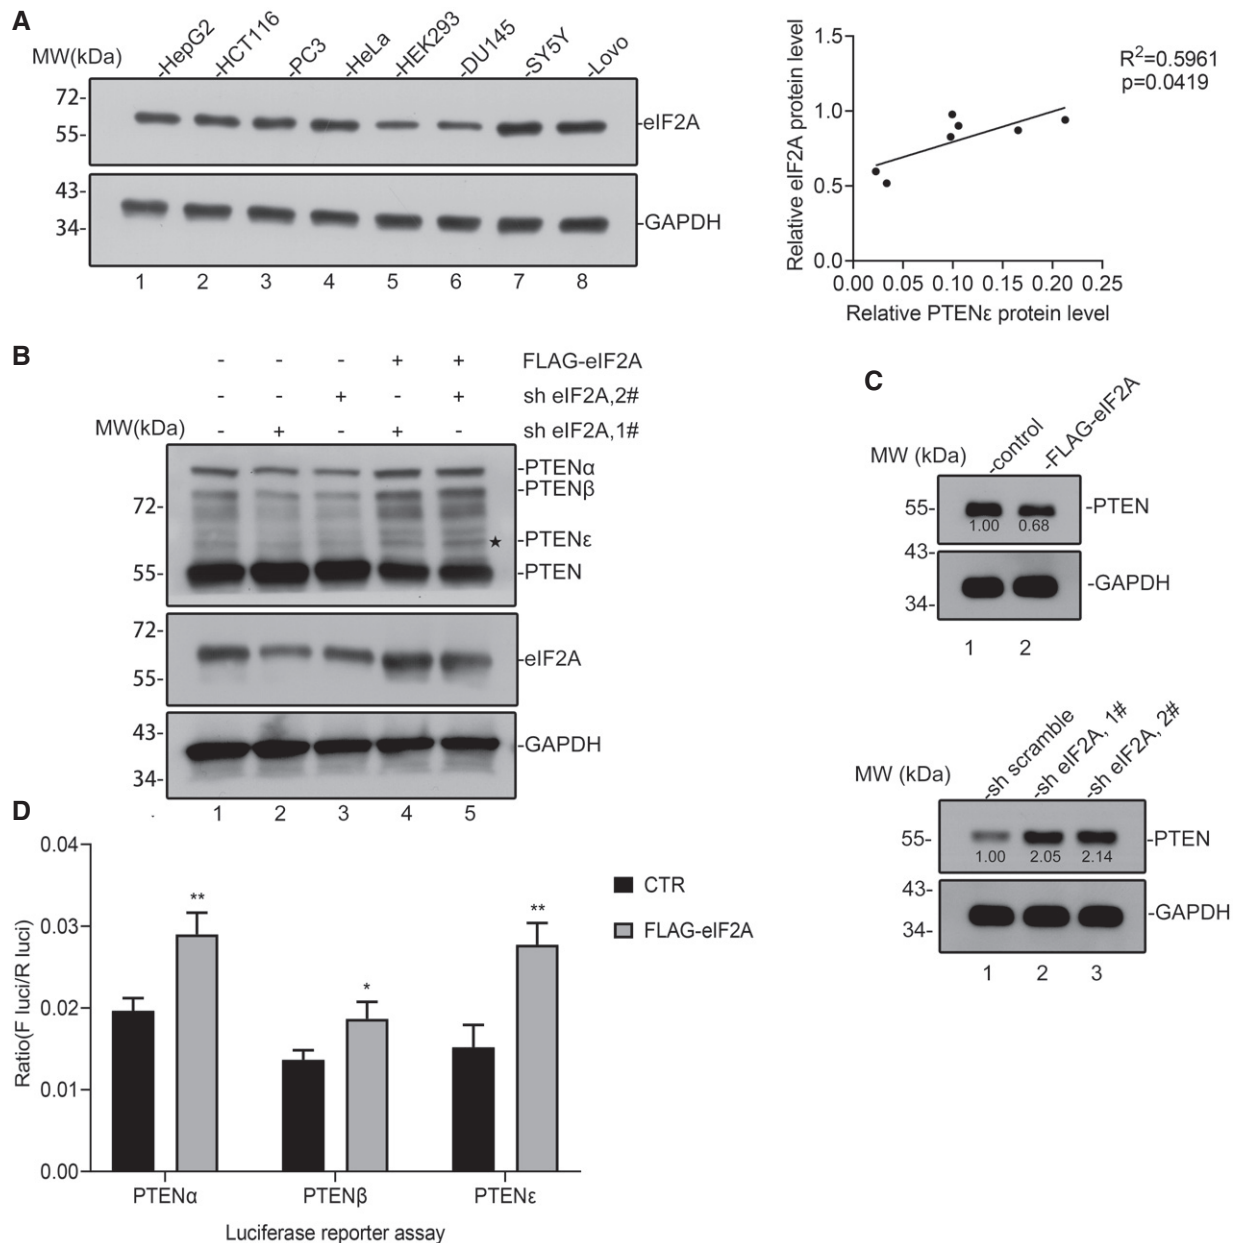

**Figure EV2. The endogenous expression of PTEN $\epsilon$  is regulated by eIF2A.**

- A Correlation analysis of PTEN $\epsilon$  protein with endogenous eIF2A protein. The eIF2A protein level in cell lines as listed in Fig 1B was measured by evaluating the gray value of relevant protein bands. Pearson's correlation test was utilized to perform the correlation analysis between endogenous eIF2A and PTEN $\epsilon$  through the GraphPad Prism 8 software.
- B Reduced expression of PTEN $\epsilon$  in eIF2A knockdown HeLa cells was rescued by eIF2A reintroduction. Wild-type FLAG-eIF2A was reintroduced into eIF2A knockdown cells used in Fig 4B, and the lysates of these HeLa cells were collected and subjected to Western blot analysis with antibodies against PTEN, eIF2A, and GAPDH.
- C The influence of eIF2A alteration on canonical PTEN expression. The relative expression of canonical PTEN in eIF2A overexpression or knockdown cells was quantified by Western blot. PTEN protein level in the aforementioned cells was measured by evaluating the gray value of corresponding protein bands. GAPDH was used as the negative control.
- D Luciferase reporter activity driven by PTEN variants after eIF2A overexpression. HEK293 cells were co-transfected with pCMV-tag2b-eIF2A or pCMV-basic plasmid and Luc2-IRES-Report plasmids (GS0112, GENESEED Biotech Co.) carrying the specific N-terminal extended nucleotide of corresponding PTEN isoforms compared with canonical PTEN. Luciferase activity was measured 24 h after transfection. All data are presented as mean  $\pm$  SD of three independent experiments and were analyzed with the unpaired t-test. \* $P < 0.05$ ; \*\* $P < 0.01$ .

Source data are available online for this figure.

**Figure EV3. PTEN $\epsilon$ , but not other known PTEN isoforms, dephosphorylates ACTR2 and VASP by its protein phosphatase activity.**

- A PTEN $\epsilon$ , but not other known PTEN isoforms, interacts with filopodia formation-related proteins. HEK293 cells were transfected with C-terminal HA and S-tagged PTEN, PTEN $\alpha$ , PTEN $\beta$ , PTEN $\epsilon$ , or mock plasmid separately, followed by immunoprecipitation with S-protein beads and Western blotting with antibodies against CDC42, VASP, ACTR2, or FSCN1, and HA, respectively.
- B Images of immunofluorescence staining for PTEN $\epsilon$  and endogenous interacting proteins (VASP, FSCN1, CDC42, and ACTR2). C-terminal GFP-tagged PTEN $\epsilon$  was introduced into HeLa PTEN $^{-/-}$  cells. Then, these transfected cells were seeded on coverslips and sequentially stained with monoclonal antibodies (Santa Cruz, sc-8401 (CDC42), sc-21743(FSCN1), sc-166103(ACTR2), and Cell Signaling Technology, 3132(VASP)) and DAPI separately. Then, all the coverslips were imaged by confocal microscopy. The scale bars represent 5  $\mu$ m.
- C Overexpression of PTEN $\epsilon$ , but not other PTEN variants, reduces the endogenous phosphorylation of ACTR2 (lower panel) and VASP (upper panel). HA and S-tagged canonical PTEN, PTEN $\alpha$ , PTEN $\beta$ , PTEN $\epsilon$ , and PTEN $\epsilon$  Y210L were introduced into HeLa PTEN $^{-/-}$  cells, followed by immunoblotting with antibodies against p-ACTR2 (Thr237 and Thr238), p-VASP(Ser157), p-VASP (Ser239), p-VASP (Thr278), VASP, ACTR2, GAPDH, and HA tag.
- D Purified ACTR2 or VASP was phosphorylated *in vitro* by NIK or PKA and subsequently used in a phosphatase assay with wild-type His-PTEN $\epsilon$ , protein phosphatase-deficient His-PTEN $\epsilon$  Y210L or without purified PTEN $\epsilon$  protein as a control, followed by immunoblotting with antibodies against p-ACTR2 (Thr237 and Thr238, lower panel) and p-VASP (Ser157, upper panel). Purified proteins (PTEN $\epsilon$ , PTEN $\epsilon$  Y210L, PKA, NIK, ACTR2, and VASP) were detected by anti-His antibody (ZSGB-BIO, TA-02).

Source data are available online for this figure.

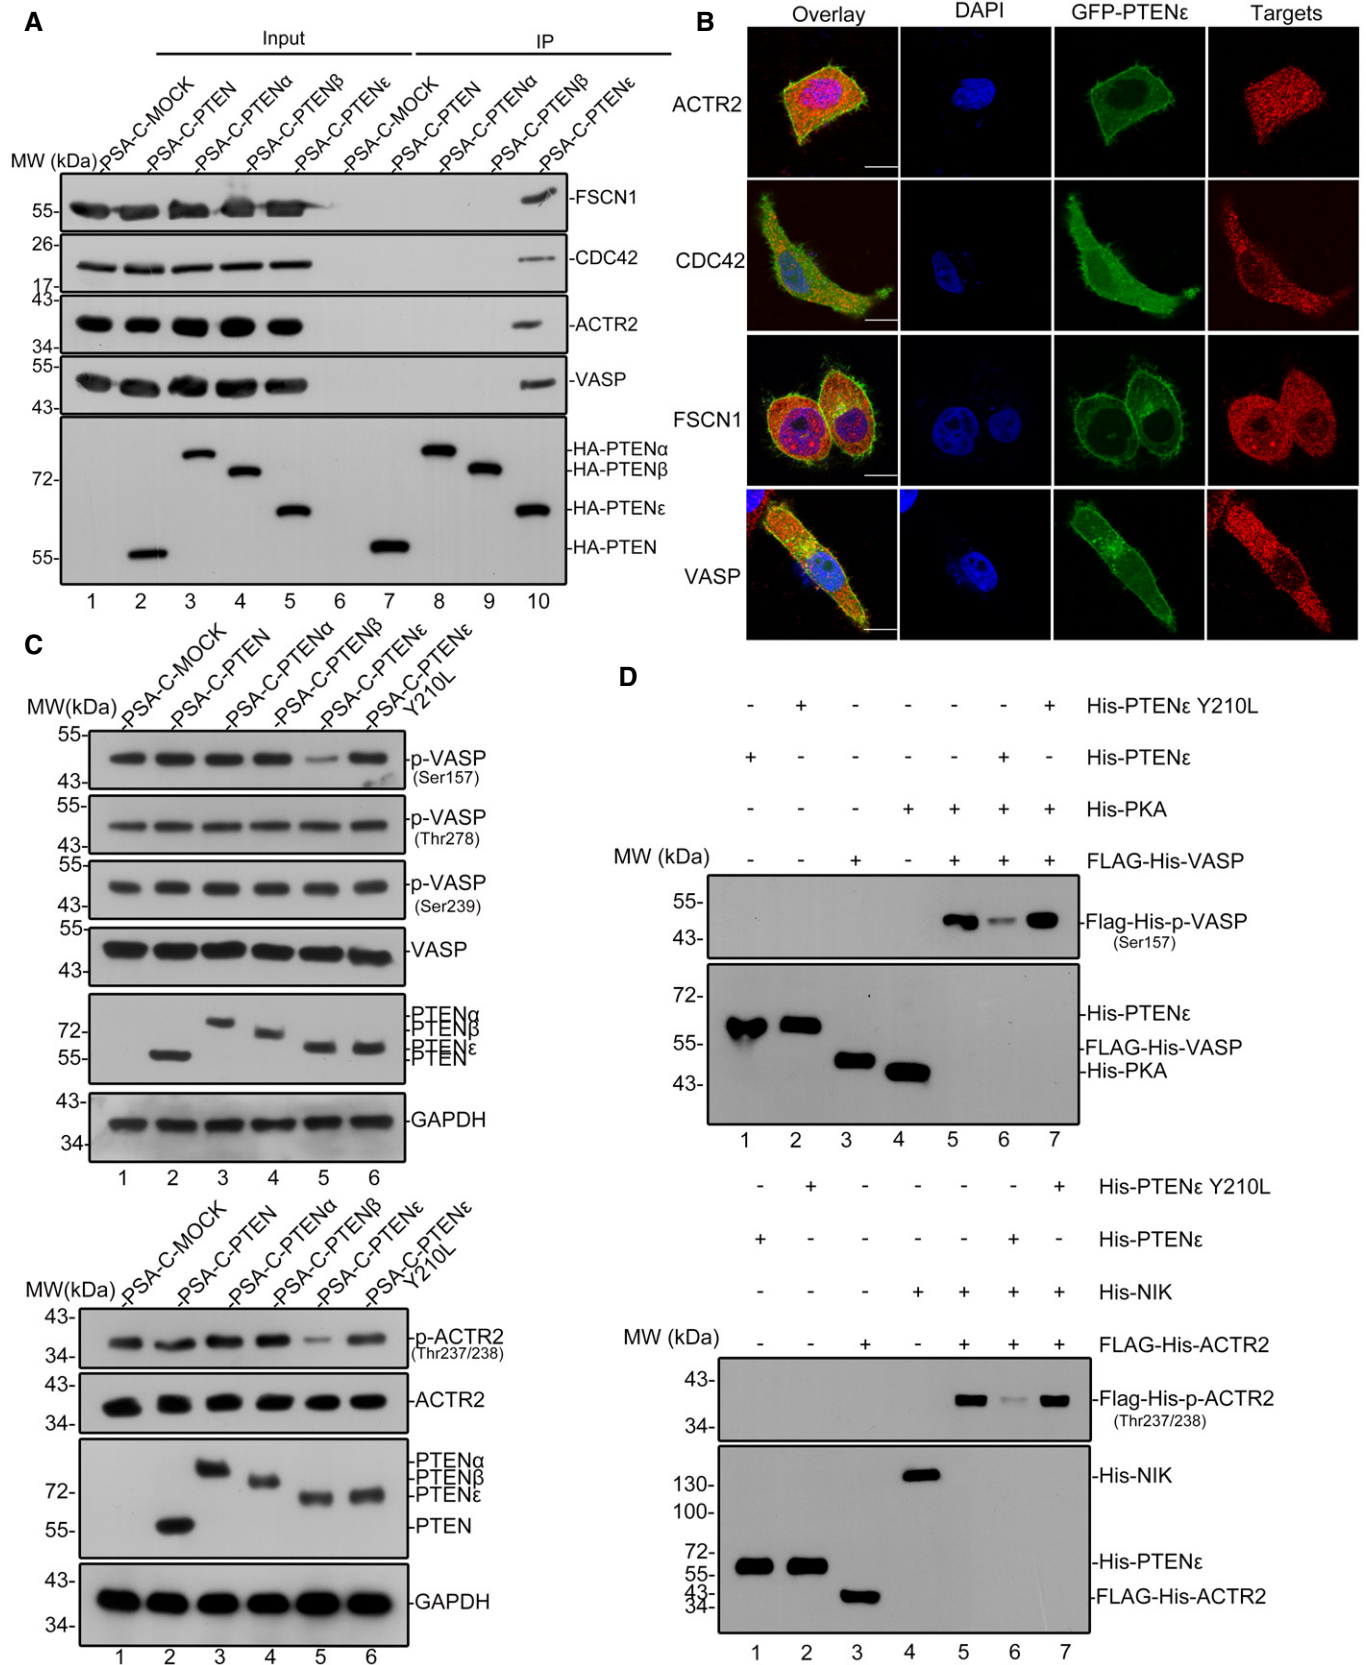

Figure EV3.

**Figure EV4. PTEN $\epsilon$  plays a critical role in suppressing filopodia formation.**

- A Immunofluorescence staining of F-actin in wild-type PTEN $\epsilon$  or mutant PTEN $\epsilon$  overexpressed HeLa *PTEN*<sup>-/-</sup> cells and control cells. PTEN $\epsilon$ -GFP, PTEN $\epsilon$  69–81aa delete-GFP, or mock construct was introduced into HeLa *PTEN*<sup>-/-</sup> cells. The transfected cells were stained with Phalloidin and DAPI before being imaged with confocal microscopy. The scale bars represent 5  $\mu$ m (left panel). White arrows shown in the magnified immunofluorescence images indicate the filopodia in the cell membrane.
- B Quantification of the number of filopodia per cell by FiloQuant software. The data are presented as mean  $\pm$  SD of three independent experiments and were analyzed with the unpaired *t*-test. \*\*\*\**P* < 0.0001.
- C The phosphorylation of VASP and ACTR2 in PTEN $\epsilon$  depleted HeLa cells. HeLa WT and HeLa PTEN $\epsilon$ <sup>+/-</sup> cell lysates were immunoblotted with antibodies against p-ACTR2 (Thr237 and Thr238), p-VASP (Ser157), p-VASP (Ser239), p-VASP (Thr278), VASP, ACTR2, and GAPDH.
- D, E The influence of endogenous PTEN $\epsilon$  depletion on filopodia formation. (D) Immunofluorescence staining of F-actin in HeLa PTEN $\epsilon$ <sup>+/-</sup> cells and wild-type cells. HeLa PTEN $\epsilon$ <sup>+/-</sup> cells and wild-type cells were stained with Phalloidin and DAPI before being imaged with confocal microscopy. The scale bars represent 5  $\mu$ m. White arrows shown in the magnified immunofluorescence images indicate the filopodia in the cell membrane. (E) Quantification of the number of filopodia per cell by FiloQuant software and the data are presented as mean  $\pm$  SD of three independent experiments and were analyzed with the unpaired *t*-test. \*\*\*\**P* < 0.0001.
- F The influence of PTEN $\epsilon$  deficiency on HeLa cell morphology. The morphology of HeLa PTEN $\epsilon$ <sup>+/-</sup> cells was observed with a Nikon microscope. Representative images of each group were shown at a higher magnification. The scale bars represent 80  $\mu$ m.

Source data are available online for this figure.

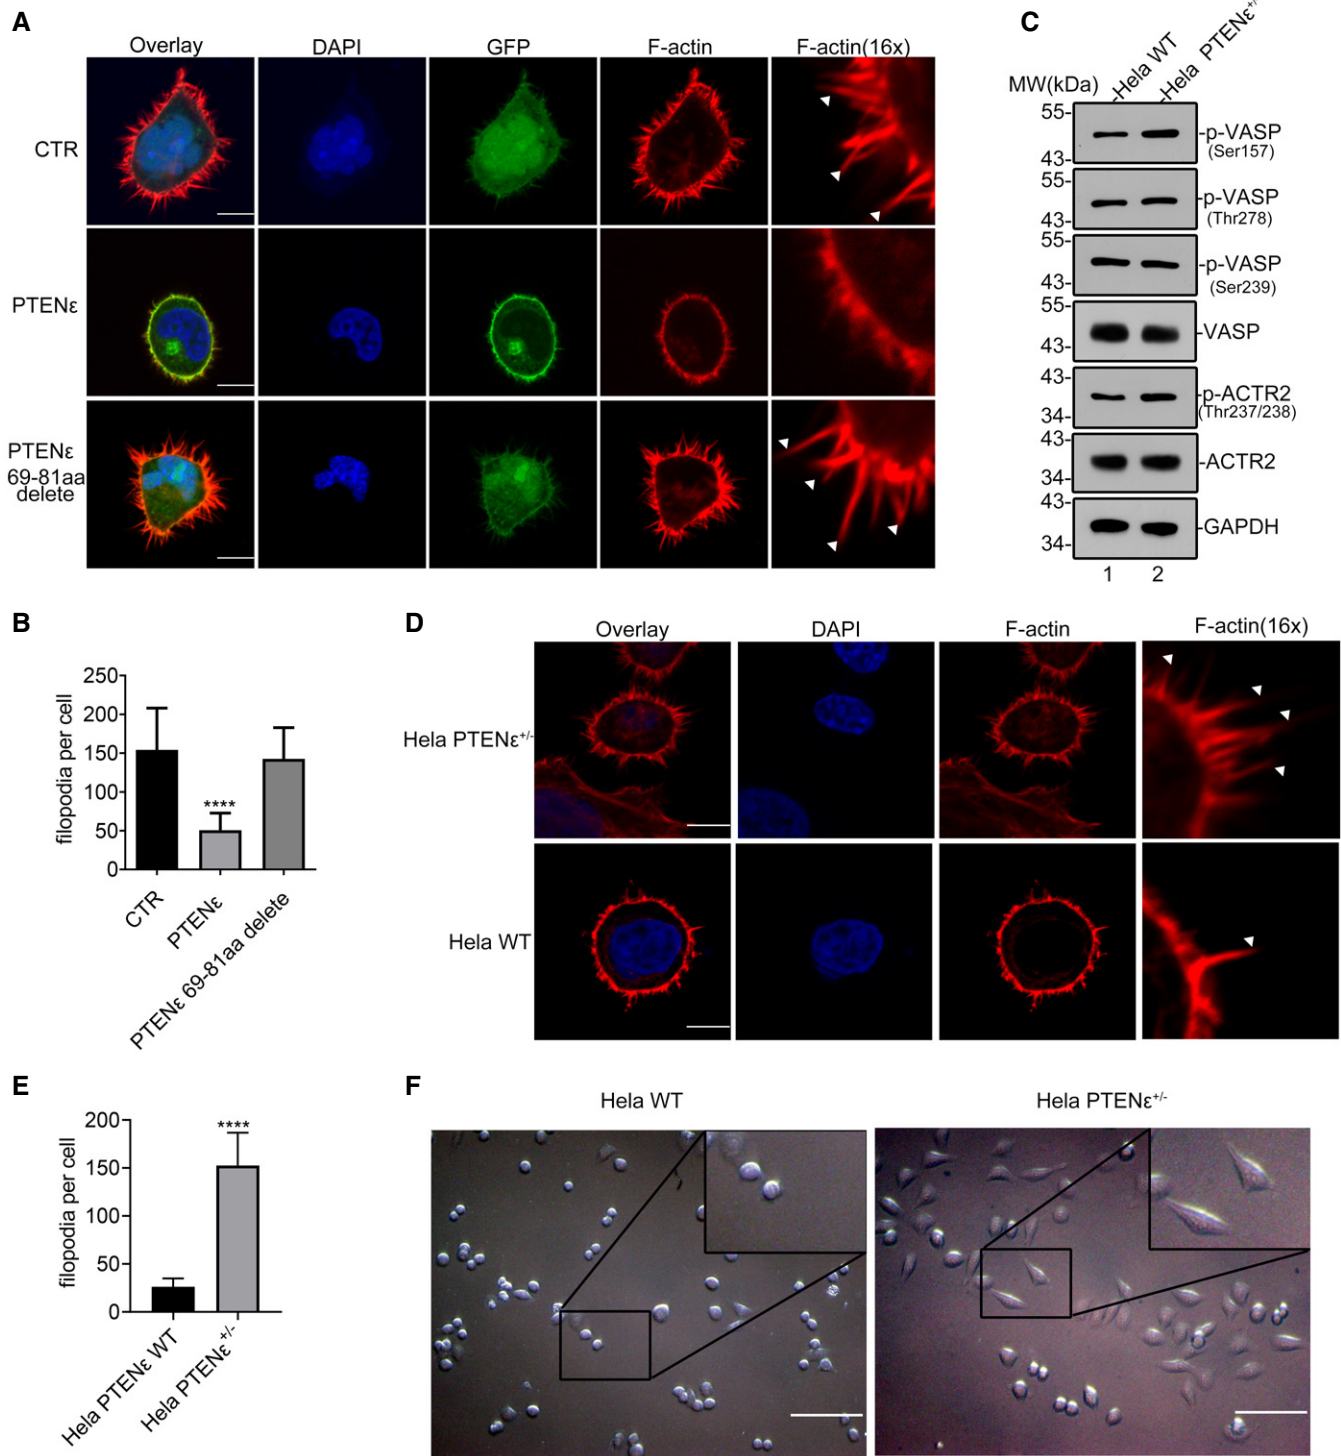

Figure EV4.
